# Supplementary material
Source: PubMed Central journal article supplement (PMC7282108)
Supplement: 13054_2020_3031_MOESM1_ESM.pdf [file 13054_2020_3031_MOESM1_ESM.pdf]

### Legend

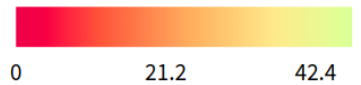

#### subject\_id: CHU

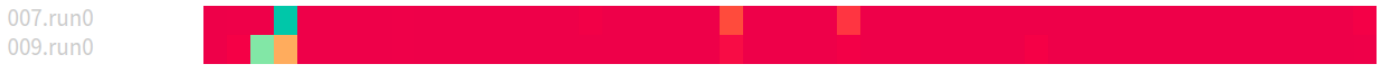

#### subject\_id: DEM

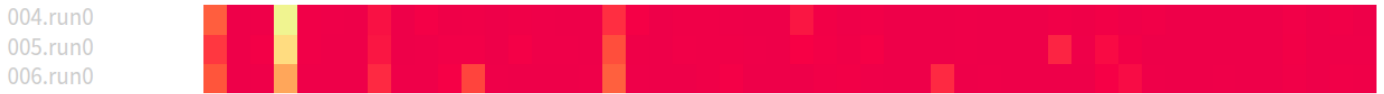

#### subject\_id: KAE

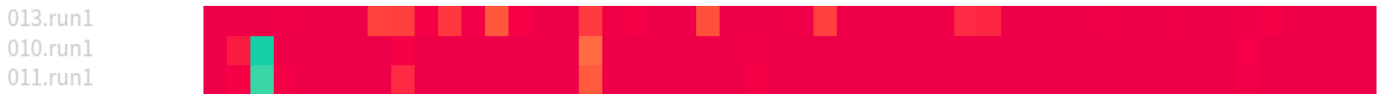

#### subject\_id: KHOZ

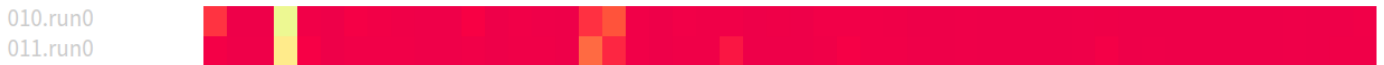

#### subject\_id: MIN

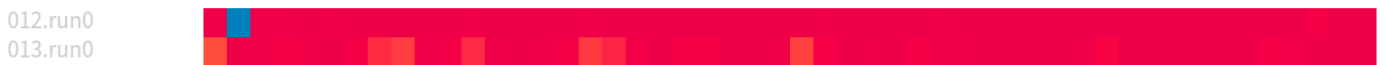

#### subject\_id: PNN

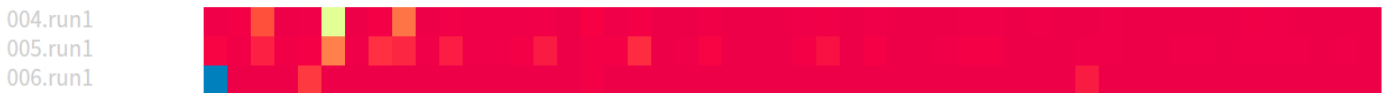

#### subject\_id: SOA

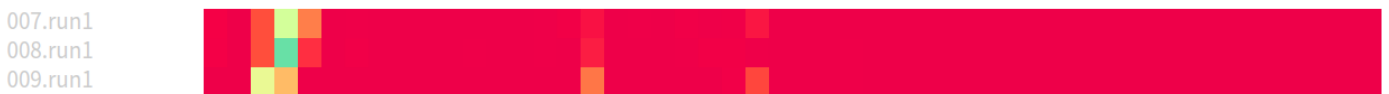

#### subject\_id: TRU

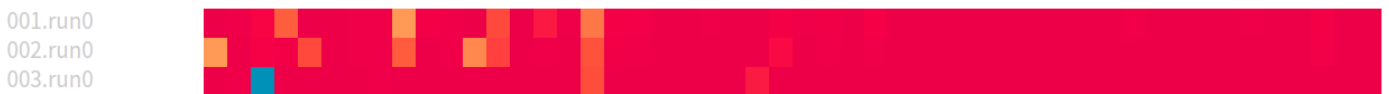

#### subject\_id: VTI

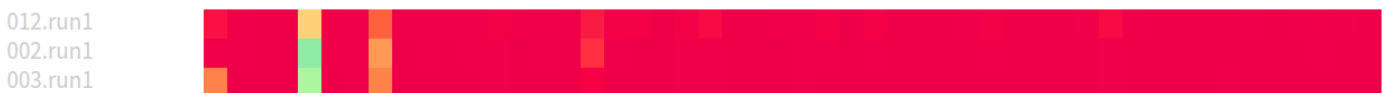

Bacteroides  
Staphylococcus  
Enterococcus  
u(f\_\_Enterobacteriaceae)  
Parabacteroides  
Corynebacterium  
u(f\_\_Erysipelotrichaceae)  
u(o\_\_Clostridiales)  
Lactobacillus  
[Ruminococcus]  
Blautia  
Prevotella  
Bifidobacterium  
Collinsella  
[Eubacterium]  
Bilophila  
Streptococcus  
u(f\_\_Ruminococcaceae)  
Dorea  
Pseudoramibacter\_Eubacte...  
u(f\_\_Rikenellaceae)  
Coprococcus  
Klebsiella  
u(f\_\_Enterococcaceae)  
Eggerthella  
u(f\_\_Christensenellaceae)  
u(f\_\_Lachnospiraceae)  
Serratia  
u(f\_\_Clostridiaceae)  
u(f\_\_Leuconostocaceae)  
Lactococcus  
Bulleidia  
u(f\_\_Coriobacteriaceae)  
Catenibacterium  
Christensenella  
Granulicatella  
Succinivibrrio  
u(f\_\_[Barnesiellaceae])  
Ruminococcus  
Faecalibacterium  
Phascolarctobacterium  
SMB53  
u(f\_\_Peptostreptococcaceae)  
Akkermansia  
u(f\_\_Planococcaceae)  
u(o\_\_RF39)  
Oscillospira  
Parvimonas  
Clostridium  
Haemophilus
