# Supplementary material
Source: PubMed Central journal article supplement (PMC7282108)
Supplement: 13054_2020_3031_MOESM2_ESM.pdf [file 13054_2020_3031_MOESM2_ESM.pdf]

## Legend

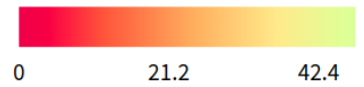

### subject\_id: DSA

094.run2  
095.run2  
096.run2

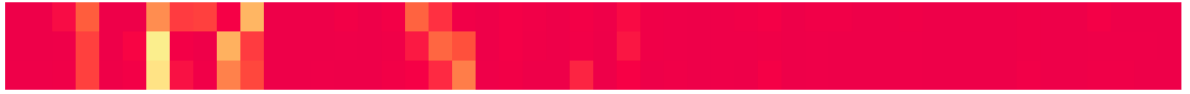

### subject\_id: EDA

093.run2

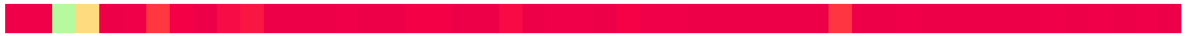

### subject\_id: INI

089.run2

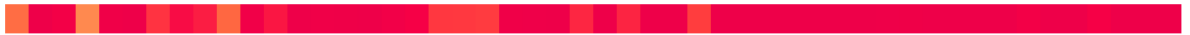

### subject\_id: KAKH

090.run2  
091.run2  
092.run2

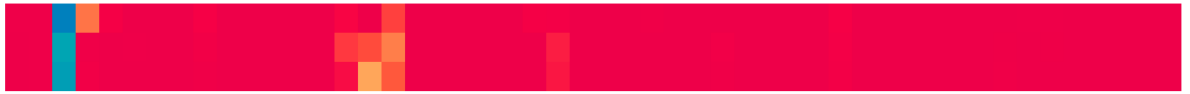

### subject\_id: KVS

055.run2  
056.run2  
057.run2

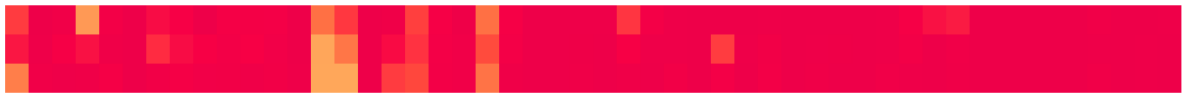

### subject\_id: MAZ

050.run2  
051.run2

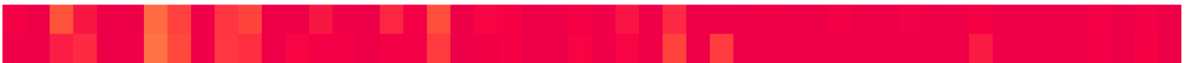

### subject\_id: SAA

052.run2  
053.run2  
054.run2

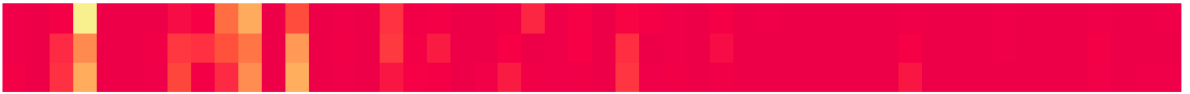

### subject\_id: SAYU

058.run2  
059.run2  
060.run2

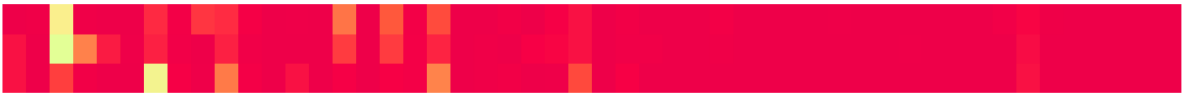

### subject\_id: TVD

062.run2  
063.run2  
064.run2

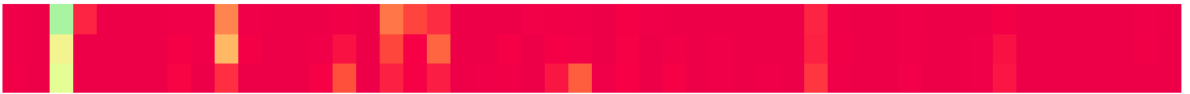

Bacteroides  
Staphylococcus  
Enterococcus  
u(f\_\_Enterobacteriaceae)  
Parabacteroides  
Corynebacterium  
u(f\_\_Erysipelotrichaceae)  
u(o\_\_Clostridiales)  
Lactobacillus  
[Ruminococcus]  
Blautia  
Prevotella  
Bifidobacterium  
Collinsella  
[Eubacterium]  
Bifidobacterium  
Streptococcus  
u(f\_\_Ruminococcaceae)  
Dorea  
Pseudoramibacter\_Eubacte...  
u(f\_\_Rikenellaceae)  
Coprococcus  
Klebsiella  
u(f\_\_Enterococcaceae)  
Eggerthella  
u(f\_\_Christensenellaceae)  
u(f\_\_Lachnospiraceae)  
Serratia  
u(f\_\_Clostridiaceae)  
u(f\_\_Leuconostocaceae)  
Lactococcus  
Bulleidia  
u(f\_\_Coriobacteriaceae)  
Catenibacterium  
Christensenella  
Granulicatella  
Succinivibrio  
u(f\_\_[Barnesiellaceae])  
Ruminococcus  
Faecalibacterium  
Phascolarctobacterium  
SMB53  
u(f\_\_Peptostreptococcaceae)  
Akkermansia  
u(f\_\_Planococcaceae)  
u(o\_\_RF39)  
Oscillospira  
Parvimonas  
Clostridium  
Haemophilus
